# Supplementary material
Source: Research Square preprint supplement (doi:10.21203/rs.3.rs-8924911/v1)
Supplement: Supplementary file 1 [file e9c014e1341c8b3e34dac801.xlsx]

## Sheet: Sheet1
Study ID	Title	Year	Sequencing context	Error types	Dominant error	Coding / error-correction method	Biological constraints	Key contribution
1	The Essential Component in DNA-Based Information Storage System: Robust Error-Tolerating Module.	2014	Not specified	Substitution, Insertion, Deletion	Not specified	Reed–Solomon, Sequence alignment, Hybrid	GC-content balancing, Homopolymer avoidance	Identified and defined the "error-tolerating module" as a mandatory component for DNA storage systems, arguing that it is essential for handling the high error rates inherent in biological synthesis and sequencing
2	Portable and Error-Free DNA-Based Data Storage.	2017	Nanopore	Substitution, Insertion, Deletion	Deletion	Constrained coding, Sequence alignment, Hybrid	GC-content balancing, Homopolymer avoidance	Achieved error-free data recovery using portable nanopore sequencing with random access
3	Data storage in DNA with fewer synthesis cycles using composite DNA letters.	2019	Illumina	Substitution, Insertion, Deletion	Substitution	Reed–Solomon, Constrained coding, Hybrid	GC-content balancing, Homopolymer avoidance	Developed a method using "composite DNA letters" (mixtures of nucleotides at a single position) to reduce synthesis cycles by 20% while maintaining high logical density.
4	Optimized Code Design for Constrained DNA Data Storage With Asymmetric Errors	2019	Simulation	Asymmetric Substitution	Substitution	Reed–Solomon, Constrained coding, Hybrid	GC-content balancing, Homopolymer avoidance	Developed an optimized code mapping strategy for DNA storage that significantly improves reliability by accounting for the asymmetry of nucleotide substitution errors. The method optimizes the mapping between digital symbols and DNA bases to minimize the impact of the most frequent biological transitions, while simultaneously maintaining necessary biochemical constraints.
5	Capacity-Approaching Constrained Codes with Error Correction for DNA-Based Data Storage	2020	Not specified	Substitution, Insertion, Deletion	Multiple	Constrained coding, Hybrid	GC-content balancing	Developed simple and efficient encoders that achieve near-capacity rates while simultaneously satisfying strict biological constraints (GC-content and homopolymer limits) and providing the ability to correct a single edit error (substitution, insertion, or deletion).
6	HEDGES error-correcting code for DNA storage corrects indels and allows sequence constraints.	2020	Illumina + Nanopore	Insertion, Deletion, Substitution	Indel	Constrained coding, Hybrid	GC-content balancing, Homopolymer avoidance, Undesired motifs	Developed the HEDGES algorithm, a convolutional-style error-correcting code that effectively repairs indels and substitutions while simultaneously enforcing string-level biological constraints through a greedy exhaustive search
8	Overcoming High Nanopore Basecaller Error Rates for DNA Storage via Basecaller-Decoder Integration and Convolutional Codes	2020	Nanopore	Insertion, Deletion, Substitution	Indel	Convolutional codes, Reed–Solomon, Hybrid	Not explicitly specified	Developed a novel decoding architecture that integrates the nanopore basecaller with the ECC decoder. By using a Viterbi-based decoder on the raw neural network output (soft information) rather than on processed text, the system significantly reduces the required sequencing coverage, making nanopore-based DNA storage more efficient and cost-effective.
9	A Quaternary Code Correcting a Burst of at Most Two Deletion or Insertion Errors in DNA Storage.	2021	Not specified	Insertion, Deletion	Indel	Constrained coding	None explicitly optimized	Proposed a novel quaternary code and decoding algorithm capable of correcting a burst of up to two consecutive deletion or insertion errors in DNA strands with a redundancy of roughly $2 \log_{4}8n$
10	Correcting a Single Indel/Edit for DNA-Based Data Storage: Linear-Time Encoders and Order-Optimality	2021	Not specified	Insertion, Deletion, Substitution	Multiple	Constrained coding, Hybrid	GC-content balancing	Developed the first linear-time, order-optimal encoders for DNA storage that correct a single edit (substitution, insertion, or deletion). The study specifically improves upon Tenengolts”™ 1984 results by reducing redundancy and integrating a modified Knuth”™s balancing technique to ensure strict GC-content requirements.
11	Limited-Magnitude Error Correction for Probability Vectors in DNA Storage	2021	Simulation	Limited-magnitude probability errors	Multiple	Constrained coding, Hybrid	Not explicitly optimized	Developed the first systematic block code constructions for limited-magnitude errors on probability vectors. The research establishes outer and inner bounds for these codes and demonstrates how the unique properties of composite DNA letters can be used to improve storage complexity and reliability.
12	An Efficient Bucket-allocation Decoding Method Based on Forward Error Correction Codes for Deoxyribo Nucleic acid Storage	2022	Simulation	Insertion, Deletion, Substitution	Indel	Forward Error Correction (FEC), Hybrid	Not specified	Introduced a bucket-allocation decoding method for DNA storage that maps sequencing reads to "buckets" based on their position and identity. This approach allows the system to efficiently recover data even in the presence of high insertion and deletion rates (up to 15%) by using majority voting within the buckets to correct errors.
13	DeSP: a systematic DNA storage error simulation pipeline.	2022	Illumina + Nanopore	Substitution, Insertion, Deletion, Sequence loss	Substitution	Reed–Solomon, Constrained coding, Hybrid	GC-content balancing, Homopolymer avoidance	Developed DeSP, a systematic DNA storage error simulation pipeline that models end-to-end noise (synthesis to sequencing) to optimize encoding redundancy and predict success probabilities in silico
14	A Segmented-Edit Error-Correcting Code with Re-Synchronization Function for DNA-Based Storage Systems	2023	Simulation	Insertion, Deletion, Substitution	Indel	Constrained coding, Hybrid	GC-content balancing, Homopolymer avoidance	Developed a segmented-edit error-correcting code with a built-in re-synchronization function. This method divides DNA strands into segments with specific markers, preventing error propagation and allowing the system to recover synchronization after deletions or insertions, thereby significantly improving the success rate of information recovery.
15	DNA-Aeon provides flexible arithmetic coding for constraint adherence and error correction in DNA storage.	2023	Illumina	Substitution, Insertion, Deletion, Str, erasures	Substitution	Constrained coding, Sequence alignment, Hybrid	GC-content balancing, Homopolymer avoidance, Undesired motifs	Developed DNA-Aeon, a concatenated coding scheme using arithmetic coding principles and Raptor fountain codes that provides high flexibility for user-defined biological constraints (GC, homopolymers, motifs) and achieves lower synthesis costs (up to 60% less) compared to existing codes while maintaining high error resilience
16	Integrated Error Correction to Enhance Efficiency of Digital Data Storage Based on DNA Nanostructures.	2023	Simulation	Insertion, Deletion, Substitution	Substitution	Reed–Solomon, Constrained coding, Sequence alignment, Hybrid	GC-content balancing, Homopolymer avoidance	Developed an Integrated Error Correction (IEC) decoding strategy that significantly reduces redundancy (down to 2.4%) while maintaining high informational density (1.4 bits/nt). It utilizes a modified majority voting algorithm and sequence alignment to recover data from error-prone DNA sequences more efficiently than previous encoding-only strategies
17	RepairNatrix: a Snakemake workflow for processing DNA sequencing data for DNA storage.	2023	Illumina + Nanopore	Substitution, Insertion, Deletion	Not specified	Sequence alignment, Hybrid	GC-content balancing, Homopolymer avoidance	Developed RepairNatrix, an open-source Snakemake workflow that automates the processing of raw DNA sequencing data (clustering, alignment, and consensus) to provide a reproducible and fair benchmarking environment for different DNA storage codes.
18	Study of the error correction capability of multiple sequence alignment algorithm (MAFFT) in DNA storage.	2023	Simulation	Insertion, Deletion, Substitution	Indel	Sequence alignment	None explicitly optimized	Conducted a comprehensive simulation study on the error correction capability of the MAFFT algorithm, identifying a performance phase transition at a 20% error rate
19	Using Soft Information to Improve Error Tolerance of Motif-Based DNA Storage Systems	2023	Illumina + Nanopore	Substitution, Insertion, Deletion	Multiple	LDPC, Hybrid	GC-content balancing, Homopolymer avoidance	Developed a pipeline for motif-based DNA storage that utilizes "soft information" (probabilistic data from the decoding process) to significantly improve error tolerance. This approach allows for the use of cheaper, pre-synthesized DNA components while maintaining high data reliability through advanced LDPC decoding.
20	Challenges for error-correction coding in DNA data storage: photolithographic synthesis and DNA decay	2024	Illumina	Deletion, Substitution, Insertion, Str, fragmentation	Deletion	DNA Fountain, Sequence alignment, Hybrid	GC-content balancing, Homopolymer avoidance	Characterized error profiles for two specific challenges: photolithographic synthesis (high deletion rates) and DNA decay (fragmentation), demonstrating that digital data can still be recovered from highly degraded samples using robust inner-sequence redundancy and alignment.
21	Composite Hedges Nanopores codec system for rapid and portable DNA data readout with high INDEL-Correction	2024	Nanopore	Insertion, Deletion, Substitution	Indel	HEDGES, Hybrid	GC-content balancing, Homopolymer avoidance	Developed the Composite Hedges Nanopores system, which utilizes a composite DNA strategy (degenerate bases) to increase information density to 1.17 bits/nt. It successfully demonstrated rapid data readout (20–120 mins) from high-error nanopore reads, requiring significantly lower physical red
22	DNA Bloom Filter enables anti-contamination and file version control for DNA-based data storage.	2024	Illumina + Simulation	Substitution, Insertion, Deletion	Substitution	Hybrid (Bloom filter), Sequence alignment	GC-content balancing, Homopolymer avoidance	Uses Bloom/Counting Bloom filters to filter non-target reads (anti-contamination) and enable low-cost file version control in DNA storage.
23	DNA-Correcting Codes: End-to-End Correction in DNA Storage Systems	2024	Not specified	Substitution, Insertion, Deletion	Not specified	Hybrid	None explicitly optimized	Introduced DNA-correcting codes and a novel distance metric designed to ensure unique data retrieval by integrating the traditionally separate steps of clustering, trace reconstruction, and error correction.
24	Efficient DNA-based data storage using shortmer combinatorial encoding.	2024	Illumina	Substitution, Insertion, Deletion	Substitution	Reed–Solomon, Constrained coding, Hybrid	GC-content balancing, Homopolymer avoidance	Introduced "combinatorial DNA encoding" using subsets of DNA shortmers to create large combinatorial alphabets, achieving up to a 6.5-fold increase in logical density
25	Error-Correcting Codes for Nanopore Sequencing	2024	Nanopore	Substitution	Substitution	Graph-based codes, Hybrid	Not specified	Develops codes for a nanopore-inspired sliding-window composition channel with substitution noise; derives redundancy bounds and near-optimal constructions.
26	Overcoming the High Error Rate of Composite DNA Letters-Based Digital Storage through Soft-Decision Decoding.	2024	Illumina + Simulation	Substitution, Insertion, Deletion, , Sampling bias	Not specified	Reed–Solomon, Hybrid	GC-content balancing, Homopolymer avoidance	Introduced Derrick-cp, a soft-decision decoding algorithm for composite DNA letters that predicts and rectifies errors based on distinctive letter sensitivities, reducing sequencing depth requirements by 50% and costs by 22%
27	Protecting the Future of Information: LOCO Coding with Error Detection for DNA Data Storage	2024	Simulation	Substitution, Deletion, Insertion	Substitution	Constrained coding, Hybrid	Homopolymer avoidance	Developed D-LOCO codes, which provide a low-complexity, high-rate method for encoding data into DNA while simultaneously preventing long homopolymers and enabling the detection and correction of substitution and synchronization errors without additional parity bits.
28	Turbo autoencoders for the DNA data storage channel with Autoturbo-DNA.	2024	Illumina	Substitution, Insertion, Deletion	Substitution	Neural network, Hybrid	GC-content balancing, Homopolymer avoidance	Presented "Autoturbo-DNA," a PyTorch framework for training error-correcting turbo autoencoders specifically tailored to the DNA data storage channel, supporting high customizability and adherence to user-defined constraints
29	Adaptive Arithmetic Coding-Based Encoding Method Toward High-Density DNA Storage.	2025	Simulation	Substitution, Insertion, Deletion	Substitution	Constrained coding, Hybrid	GC-content balancing, Homopolymer avoidance	Introduced an encoding method based on Adaptive Arithmetic Coding (AAC) using Prediction by Partial Matching (PPM), achieving a high information density of 1.77 bits/nt while maintaining robustness against errors
30	Codes for Limited-Magnitude Probability Error in DNA Storage	2025	Simulation	Probability error	Multiple	Constrained coding, Hybrid	Not explicitly optimized	Introduced block codes for limited-magnitude probability errors, establishing theoretical bounds and providing systematic code constructions that leverage the properties of composite DNA letters to improve information density and reduce synthesis costs.
31	DNA palette code for time-series archival data storage.	2025	Nanopore	Substitution, Insertion, Deletion	Substitution	Constrained coding, Hybrid	GC-content balancing, Homopolymer avoidance, Undesired motifs	Developed the "DNA palette code" specifically for time-series archival data, enabling high-density storage (up to 2.16 bits/nt) and multi-version data retrieval with high robustness against Nanopore sequencing errors.
32	Dna-storalator: a computational simulator for DNA data storage.	2025	Simulation	Insertion, Deletion, Substitution	Not specified	Sequence alignment, Hybrid	GC-content balancing, Homopolymer avoidance	Developed "DNA-Storalator," a cross-platform computational simulator that emulates the biological and algorithmic components of DNA data storage to aid in the development of new coding solutions
33	INNSE: Invertible neural network-based DNA image storage with self-correction encoding.	2025	Simulation	Substitution, Insertion, Deletion	Substitution	Neural network, Hybrid	GC-content balancing, Homopolymer avoidance, Undesired motifs	Proposed INNSE, an invertible neural network framework that integrates image compression with a self-correcting DNA codebook, achieving higher encoding density (up to 1.83 bits/nt) and faster processing than traditional methods while maintaining high image reconstruction quality
34	Key technologies for DNA storage: encoding, error correction, random access, and security	2025	Not specified	Substitution, Insertion, Deletion	Not specified	Reed–Solomon, Constrained coding, DNA Fountain, Hybrid	GC-content balancing, Homopolymer avoidance, Secondary structure avoidance	Provides a comprehensive review of the state-of-the-art in DNA data storage, specifically categorizing and analyzing advancements in encoding strategies, error correction techniques, random access methods, and data security/encryption
35	LOCO Codes Can Correct as Well: Error-Correction Constrained Coding for DNA Data Storage	2025	Simulation	Substitution, Deletion, Insertion	Substitution	Constrained coding, Hybrid	GC-content balancing, Homopolymer avoidance	Demonstrated that LOCO codes can be utilized as low-complexity error-correcting codes for DNA storage, providing a unified solution that simultaneously enforces biological constraints (GC-balance and homopolymer limits) and corrects single substitution or synchronization errors
